# Supplementary material for: Regulation of expression of starch synthesis genes by ethylene and ABA in relation to the development of rice inferior and superior spikelets
Source: PubMed Central journal article supplement — J Exp Bot. 2011 Mar 31;62(11):3907–16. doi: 10.1093/jxb/err088 (PMC3134347; doi:10.1093/jxb/err088), 2011-03-31
Supplement: supp_err088_Supplementary_3-5.pdf [file supp_err088_Supplementary_3-5.pdf]

## **Supplementary material**

### **Figure legends**

Table S1 up/down-regulated genes in superior spikelets compared with inferior ones at 3 DPA. Superior spikelets are those flowered on the first 2-d within a panicle and inferior spikelets are those flowered on the last 2-d within a panicle.

Table S2 up/down-regulated genes in superior spikelets compared with inferior ones at 9 DPA. Superior spikelets are those flowered on the first 2-d within a panicle and inferior spikelets are those flowered on the last 2-d within a panicle.

Table S3 Expression of genes related to starch metabolism in developing caryopses by microarray analysis. RNA was extracted from superior and inferior spikelets at 3 and 9 DPA, respectively.

Table S4 Expression of genes related to hormones metabolism in developing caryopses by microarray analysis. RNA was extracted from superior and inferior spikelets at 3 and 9 DPA, respectively.

Table S5 Primers used in the present study.

Table S3

| Acc. No. | Gene name     | Enzyme                                        | 3 DPA |          |          | 9 DPA |          |          |
|----------|---------------|-----------------------------------------------|-------|----------|----------|-------|----------|----------|
|          |               |                                               | Ratio | Inferior | Superior | Ratio | Inferior | Superior |
| AK073146 | <i>AGPS1</i>  | ADP-glucose pyrophosphorylase small subunit 1 | 0.66  | 13479    | 8896     | 1.07  | 22595    | 24112    |
| AK071826 | <i>AGPS2</i>  | ADP-glucose pyrophosphorylase small subunit 2 | 1.00  | 17896    | 17910    | 1.25  | 37124    | 46459    |
| AK100910 | <i>AGPL1</i>  | ADP-glucose pyrophosphorylase large subunit1  | 0.82  | 9786     | 7994     | 0.64  | 6253     | 4026     |
| AK071497 | <i>AGPL2</i>  | ADP-glucose pyrophosphorylase large subunit 2 | 1.00  | 20030    | 20106    | 1.22  | 42281    | 51738    |
| AK069296 | <i>AGPL3</i>  | ADP-glucose pyrophosphorylase large subunit 3 | 0.72  | 5429     | 3932     | 1.18  | 13360    | 15816    |
| AK121036 | <i>AGPL4</i>  | ADP-glucose pyrophosphorylase large subunit 4 | 0.63  | 245      | 156      | 0.61  | 245      | 151      |
| AK109458 | <i>SSI</i>    | Starch synthase I                             | 0.97  | 6203     | 6027     | 1.88  | 9110     | 17127    |
| AK101978 | <i>SSIa</i>   | Starch synthase IIa                           | 0.82  | 13436    | 11022    | 1.34  | 22613    | 30335    |
| AK066446 | <i>SSIb</i>   | Starch synthase IIb                           | 1.04  | 610      | 633      | 0.43  | 134      | 58       |
| AK072339 | <i>SSIIc</i>  | Starch synthase IIc                           | 1.11  | 830      | 923      | 1.25  | 644      | 804      |
| AK061604 | <i>SSIIIa</i> | Starch synthase IIIa                          | 1.14  | 2141     | 2437     | 1.56  | 2774     | 4327     |
| AK059368 | <i>SSIIIb</i> | Starch synthase IIIb                          | 1.08  | 4743     | 5139     | 0.48  | 2187     | 1041     |
| AK100976 | <i>SSIV-1</i> | Starch synthase IVa                           | 0.86  | 480      | 410      | 0.82  | 201      | 166      |
| AK067577 | <i>SSIV-2</i> | Starch synthase IVb                           | 0.80  | 1483     | 1187     | 1.22  | 2267     | 2765     |
| AK070431 | <i>GBSSI</i>  | Granule-bound starch synthase I               | 0.99  | 15928    | 15789    | 1.29  | 39345    | 50615    |
| AK102058 | <i>GBSSII</i> | Granule-bound starch synthase II              | 0.76  | 3114     | 2353     | 0.49  | 1196     | 581      |
| AK065121 | <i>BEI</i>    | Starch branching enzyme I                     | 0.95  | 11252    | 10669    | 1.17  | 39365    | 46251    |
| AB023498 | <i>BEIIa</i>  | Starch branching enzyme IIa                   | 0.81  | 14602    | 11761    | 1.08  | 8527     | 9198     |
| D16201   | <i>BEIIb</i>  | Starch branching enzyme IIb                   | 0.93  | 26197    | 24294    | 1.30  | 39850    | 51660    |
| AY578159 | <i>CIN2</i>   | Cell-wall invertase 2                         | 0.66  | 6571     | 4364     | 1.65  | 2281     | 3755     |
| AY578164 | <i>CIN7</i>   | Cell-wall invertase 7                         | 0.90  | 337      | 304      | 1.26  | 195      | 246      |

|          |              |                                            |      |       |       |      |       |       |
|----------|--------------|--------------------------------------------|------|-------|-------|------|-------|-------|
| AK100334 | <i>SuS1</i>  | Sucrose synthase 1                         | 0.98 | 6576  | 6431  | 1.21 | 2290  | 2763  |
| AK072074 | <i>SuS2</i>  | Sucrose synthase 2                         | 0.93 | 15724 | 14612 | 1.58 | 21749 | 34356 |
| AK100306 | <i>SuS3</i>  | Sucrose synthase 3                         | 1.02 | 26173 | 26647 | 1.64 | 26257 | 42939 |
| AK102158 | <i>SuS4</i>  | Sucrose synthase 4                         | 1.04 | 1607  | 1677  | 1.24 | 30011 | 37084 |
| AK063304 | <i>SuS5</i>  | Sucrose synthase 5                         | 0.67 | 124   | 83    | 1.20 | 153   | 184   |
| AK071732 | <i>SPS3</i>  | Sucrose phosphate synthase 3               | 1.40 | 1577  | 2206  | 0.87 | 997   | 867   |
| AK101676 | <i>SPS4</i>  | Sucrose phosphate synthase 4               | 0.95 | 1689  | 1607  | 0.93 | 995   | 928   |
| AK071525 | <i>SPP1</i>  | Sucrose phosphatase 1                      | 0.98 | 688   | 675   | 0.82 | 652   | 533   |
| AK063330 | <i>SPP2</i>  | Sucrose phosphatase 2                      | 0.64 | 1771  | 1131  | 0.74 | 1248  | 926   |
| AK065780 | <i>UGP1</i>  | UDP-glucose<br>pyrophosphorylase 1         | 0.93 | 19072 | 17664 | 1.29 | 32078 | 41528 |
| AK071248 | <i>UGP2</i>  | UDP-glucose<br>pyrophosphorylase 2         | 1.16 | 279   | 322   | 1.01 | 769   | 777   |
| AK068061 | <i>PGIa</i>  | Phosphate glucose isomerase<br>1           | 0.80 | 3432  | 2736  | 1.28 | 4047  | 5200  |
| AK068236 | <i>PGIb</i>  | Phosphate glucose isomerase<br>2           | 1.31 | 3284  | 4287  | 1.19 | 2743  | 3266  |
| AK100027 | <i>SUT1</i>  | Sucrose transporter 1                      | 1.19 | 1574  | 1868  | 1.25 | 3968  | 4945  |
| AK109461 | <i>SUT2</i>  | Sucrose transporter 2                      | 0.55 | 1390  | 769   | 0.97 | 934   | 910   |
| AK065430 | <i>SUT4</i>  | Sucrose transporter 4                      | 0.98 | 860   | 843   | 1.44 | 810   | 1163  |
| AK073105 | <i>SUT5</i>  | Sucrose transporter 5                      | 1.79 | 579   | 1036  | 0.88 | 120   | 105   |
| AK060577 | <i>GPT1</i>  | Glc-6-P/phosphate-<br>tranlocator 1        | 0.85 | 7187  | 6144  | 1.18 | 28358 | 33595 |
| AK070124 | <i>GPT2</i>  | Glc-6-P/phosphate-<br>tranlocator 2        | 0.60 | 8900  | 5353  | 0.19 | 787   | 148   |
| AK065618 | <i>GPT3</i>  | Putative Glc-6-P/<br>phosphate-tranlocator | 1.37 | 2793  | 3815  | 1.05 | 1665  | 1747  |
| AK062253 | <i>GPT4</i>  | Putative Glc-6-P/<br>phosphate-tranlocator | 1.10 | 2522  | 2776  | 1.08 | 1841  | 1981  |
| AK103471 | <i>BTI-1</i> | Brittle 1-1 protein                        | 1.40 | 311   | 434   | 1.23 | 232   | 286   |
| AK107368 | <i>BTI-2</i> | Brittle 1-2 protein                        | 0.99 | 20143 | 19903 | 1.25 | 35880 | 44867 |
| AK059671 | <i>Amy2A</i> | a-amylase 2A                               | 1.13 | 115   | 130   | 0.50 | 178   | 89    |
| AK064300 | <i>Amy3E</i> | a-amylase 3E                               |      |       |       | 0.39 | 5118  | 1980  |

Table S4

| Acc. no.     | Gene name      | Enzyme                              | 3d    |          |          | 9d    |          |          |
|--------------|----------------|-------------------------------------|-------|----------|----------|-------|----------|----------|
|              |                |                                     | Ratio | Inferior | Superior | Ratio | Inferior | Superior |
| AB050884     | <i>ZEP</i>     | Zeaxanthin epoxidase                | 0.97  | 367      | 380      | 0.25  | 73       | 289      |
| AK064824     | <i>NCED1</i>   | 9-cis-epoxycarotenoid dioxygenase 1 | 0.92  | 123      | 135      |       |          | 405      |
| AK107649     | <i>NCED5</i>   | 9-cis-epoxycarotenoid dioxygenase 5 | 0.80  | 372      | 467      | 0.25  | 201      | 813      |
| AK120757     | <i>ABA8ox2</i> | ABA 8'-hydroxylase 2                | 0.76  | 751      | 994      | 1.28  | 3578     | 2806     |
| AK061017     | <i>GA20ox1</i> | GA20-oxidase 1                      | 0.66  | 559      | 851      | 0.69  | 122      | 176      |
| AY114310     | <i>GA20ox2</i> | GA20-oxidase 2                      | 1.90  | 510      | 269      |       |          | 100      |
| NM_001062119 | <i>GA20ox4</i> | GA20-oxidase 4                      | 0.89  | 1408     | 1573     |       |          | 252      |
| AK101713     | <i>GA2ox3</i>  | GA2-oxidase 3                       | 2.68  | 477      | 178      | 0.91  | 547      | 601      |
| AK064250     | <i>ACS2</i>    | ACC synthase 2                      | 1.15  | 130      | 112      |       |          |          |
| AK065212     | <i>ACS6</i>    | ACC synthase 6                      | 0.97  | 3052     | 3161     | 1.60  | 1750     | 1097     |
| AK065039     | <i>ACO1</i>    | ACC oxidase 1                       | 1.24  | 217      | 176      | 0.75  | 8854     | 11879    |
| AK058296     | <i>ACO2</i>    | ACC oxidase 2                       | 1.67  | 893      | 536      | 0.48  | 521      | 1092     |
| AF049889     | <i>ACO3</i>    | ACC oxidase 3                       | 1.23  | 7327     | 5940     | 0.58  | 1390     | 2417     |
| AK102472     | <i>ACO7</i>    | ACC oxidase 7                       | 0.59  | 176      | 299      | 0.31  | 215      | 688      |
| AK071981     | <i>ckx1</i>    | cytokinin oxidase 1                 | 0.58  | 435      | 749      | 1.40  | 230      | 164      |
| AK103272     | <i>ckx3</i>    | cytokinin oxidase 3                 | 1.33  | 222      | 167      | 0.62  | 129      | 207      |
| AK101022     | <i>ckx5</i>    | cytokinin oxidase 5                 | 0.79  | 131      | 166      | 1.77  | 641      | 363      |

Table S5

| <b>Genes</b> | <b>Forward primers</b>          | <b>Reverse primers</b>            |
|--------------|---------------------------------|-----------------------------------|
| <i>AGPS1</i> | 5' AGAATGCTCGTATTGGAGAAAATG 3'  | 5' GGCAGCATGGAATAAACCCAC 3'       |
| <i>AGPS2</i> | 5' TCTTTTGTGCCCATTTCATCTGG 3'   | 5' TGATTCCAAGCACACTCTCATCGAC 3'   |
| <i>AGPL2</i> | 5' TAGATAGGCCTTGGAATCGCACC 3'   | 5' TAGAGTTCCCATTCCTCAAAACAAACC 3' |
| <i>SSI</i>   | 5' GGGCCTTCATGGATCAACC 3'       | 5' CCGCTTCAAGCATCCTCATC 3'        |
| <i>SSIa</i>  | 5' GGCCAAGTACCAATGGTGAA 3'      | 5' GCATGATGCATCTGAAACAAAAGC 3'    |
| <i>GBSSI</i> | 5' AACGTGGCTGCTCCTTGAA 3'       | 5' TTGGCAATAAGCCACACACA 3'        |
| <i>BEI</i>   | 5' TGGCCATGGAAGAGTTGGC 3'       | 5' CAGAAGCAACTGCTCCACC 3'         |
| <i>BEIb</i>  | 5' ATGCTAGAGTTTGACCGC 3'        | 5' AGTGTGATGGATCCTGCC 3'          |
| <i>SuS2</i>  | 5' TTCAGCAGGAGAAGCCGTCAGC 3'    | 5' CCGGCGTTTATTTGAGGCAAGC 3'      |
| <i>SuS3</i>  | 5' CGGTGAAAAGAATGGGCAATG 3'     | 5' CCATGAAAAGGCCAGAGCAT 3'        |
| <i>SuS4</i>  | 5' TCCGTGAACTGGCGAAGACT 3'      | 5' CCCAAGTTCGTCACCTTGCTG 3'       |
| <i>UGP1</i>  | 5' TCCTGGCCCCGGTTTAAGTCA 3'     | 5' TGCCGAATGCACACGACAAT 3'        |
| <i>GPT1</i>  | 5' AGAAGGGATCCAGATGAAGAATG 3'   | 5' AACAAGAAACGAGCAACATAGACC 3'    |
| <i>BT1-2</i> | 5' TGATTGTGCATGGGTGTGATG 3'     | 5' AACAGAGGAAATCGAATCCTACG 3'     |
| <i>NCED1</i> | 5' CTCACCATGAAGTCCATGAGGCTT 3'  | 5' GTTCTCGTAGTCTTGGTCTTGGCT 3'    |
| <i>NCED5</i> | 5' ACATCCGAGCTCCTCGTCGTGAA 3'   | 5' TTGGAAGGTGTTTTGGAATGAACCA 3'   |
| <i>ACO1</i>  | 5' GATAGCGTGTGTACCACAGCGAC 3'   | 5' CACGGTACAGCACGCCGCAC 3'        |
| <i>ACO3</i>  | 5' CGCCGCCGAGGTCGTCCACG 3'      | 5' GCCCGTTACACACACTTGAG 3'        |
| <i>ACT2</i>  | 5' CAATGTGCCAGCTATGTATGTCGCC 3' | 5' TTCCCGTTCAGCAGTGGTAGTGAAG 3'   |
| 18S rRNA     | 5' TCCATTGAAGGGCAAGTCTGG 3'     | 5' CTTGGCAAATGCTTTCGCAG 3'        |
